# Supplementary material
Source: publisher figshare collection journal article supplement (https://gsajournals.figshare.com/ndownloader/files/35058964)
Supplement: Supplementary file 1 [file 35058964]

ID	parity	year-season at birth	TNB	NBA	litter weight at birth
3071	1	314	14	12	14.5
3147	1	314	13	13	18.8
3139	1	414	16	15	19.8
3283	1	415	20	15	17.5
3199	1	415	18	17	16.4
3174	1	415	13	12	17.1
3223	1	415	15	9	14.2
3167	1	415	15	9	10
3162	1	415	15	13	17.5
3175	1	415	12	12	16.3
3059	1	415	17	13	16.2
3327	1	415	16	14	16.3
3171	1	415	18	18	23.6
3118	1	415	6	4	5.1
3299	1	415	8	7	8.7
3110	1	415	13	13	12.2
3178	1	415	20	17	15.6
3107	1	415	13	11	14.4
3176	1	415	14	11	15.4
3187	1	415	13	13	15.7
3105	1	415	13	11	16.1
3132	1	415	18	17	20.2
3108	1	415	16	13	16.5
3100	1	415	15	12	17.7
3185	1	415	13	11	15.9
3261	1	415	11	11	13.1
3279	1	415	16	14	13.1
3112	1	415	16	14	15.3
3146	1	415	18	14	17.4
3137	1	415	15	13	18.6
3120	1	415	8	4	4.9
3125	1	415	16	12	17.5
3104	1	415	17	15	20.3
3145	1	415	16	16	19.9
3290	1	415	10	10	14.3
3192	1	415	19	10	8.4
3267	1	415	15	13	18.8
3091	1	415	17	17	20.5
3333	1	415	14	14	16.9
3117	1	415	12	12	21.3
3103	1	415	9	9	15
3153	1	415	5	5	7.5
3213	1	415	15	9	12.7
3297	1	415	13	10	11.5
3183	1	415	13	12	11.8
3315	1	415	6	4	6.1
3194	1	415	15	11	10.6
3266	1	415	8	7	11
3319	1	415	16	12	17.7
3260	1	415	13	11	16.3
3296	1	415	15	13	26.1
3080	1	415	12	11	14.7
3259	1	415	7	7	11
3111	1	415	16	15	24.7
3286	1	415	15	15	19.4
3114	1	415	10	10	12.3
3246	1	415	14	10	13.4
3195	1	415	14	10	9.7
3243	1	415	5	5	7.3
3220	1	415	13	12	15.7
3343	1	415	11	11	13.6
3049	1	415	9	6	9.3
3106	1	415	10	10	13.3
3351	1	415	5	4	6.8
3350	1	415	14	13	18.5
3370	1	415	11	10	14.4
3269	1	415	17	12	15.3
3402	1	415	8	8	11.9
3101	1	415	9	9	14.4
3409	1	415	8	8	10.7
3371	1	415	15	13	15.6
3413	1	415	14	14	17.3
3406	1	415	14	13	14.3
3201	1	415	13	11	15.5
3426	1	115	14	14	18.5
3102	1	415	22	14	14.8
3376	1	415	14	14	16.9
3339	1	415	12	12	13.9
3425	1	415	15	12	14.1
3393	1	415	16	15	16
3387	1	415	16	13	14.6
3067	1	415	10	10	15.9
3427	1	415	12	10	10.8
3366	1	415	13	11	15.8
3258	1	415	12	11	12.9
3367	1	415	12	12	16.2
3218	1	415	17	14	20
3320	1	415	12	11	19.7
3396	1	415	12	12	14.7
3421	1	415	19	14	15.4
3301	1	415	18	11	9.7
3435	1	415	10	10	11.1
3398	1	415	12	12	19.3
3321	1	415	17	14	16.6
3289	1	415	18	16	16.7
3355	1	415	14	13	17.7
3429	1	415	12	12	13.5
3224	1	415	7	6	10.1
3428	1	115	14	13	14.1
3445	1	115	12	12	16.1
3403	1	115	16	13	16.9
3407	1	115	12	10	12.8
3138	1	115	4	4	6.8
3391	1	115	12	5	5.8
3386	1	115	12	9	12
3408	1	115	13	13	7.1
3166	1	115	15	15	17.7
3441	1	115	11	10	15.2
3450	1	115	16	13	14.5
3395	1	115	14	13	15.9
3252	1	115	16	15	20.5
3180	1	115	8	7	9
3390	1	115	19	19	18
3442	1	115	18	15	19.8
3211	1	115	17	15	13.7
3341	1	415	13	13	14.2
3419	1	115	17	15	17.2
3186	1	415	22	16	16.3
3420	1	415	13	12	12.5
3200	1	415	16	15	13.5
3191	1	415	18	15	20.7
3340	1	415	10	10	9.9
3331	1	415	14	11	9
3149	1	415	16	13	17.1
3389	1	415	19	15	18.8
3401	1	415	17	13	14.1
3184	1	415	12	10	12.4
3364	1	415	16	14	16.5
3060	1	415	6	6	8.1
3177	1	415	17	14	19.6
3444	1	415	12	11	13.4
3392	1	415	15	14	13
3346	1	115	21	19	14.5
3452	1	115	16	15	19
3397	1	115	10	10	11.4
3098	1	115	17	17	20.7
3494	1	115	15	15	20.8
3495	1	115	14	13	19.4
3488	1	115	17	16	19.1
3399	1	115	14	12	13.2
3245	1	415	12	12	15.7
3482	1	115	19	19	19.2
3217	1	115	13	13	12.2
3071	2	115	22	18	18.7
3383	1	115	10	9	16.9
3438	1	115	14	9	11.5
3477	1	115	21	18	20.6
3535	1	115	7	6	9.5
3436	1	115	14	12	15.2
3538	1	115	3	3	4.7
3451	1	115	10	9	9.4
3487	1	115	15	12	16.2
3147	2	115	16	16	21.7
3479	1	115	14	14	16.5
3378	1	115	18	16	18.7
3485	1	115	5	5	12.1
3507	1	115	17	15	19.3
3491	1	115	15	13	13.1
3497	1	115	13	10	15.9
3534	1	115	11	8	11
3648	1	115	15	14	18.6
3685	1	115	16	15	15.5
3465	1	115	14	13	17.1
3483	1	115	15	14	16.9
3470	1	115	10	10	13.8
3322	1	115	14	14	20.6
3499	1	115	13	10	10.7
3536	1	115	5	5	7.9
3589	1	115	12	12	18.2
3400	1	115	12	10	17.5
3681	1	115	13	12	15.6
3496	1	115	9	9	12.4
3476	1	115	16	14	19.4
3404	1	115	14	12	16.9
3554	1	115	16	15	18.2
3638	1	115	17	14	15.8
3558	1	115	10	7	8.9
3637	1	115	12	8	13.2
3372	1	115	19	15	17.8
3375	1	115	14	14	14.6
3144	1	115	18	13	17.5
3466	1	115	5	4	6.7
3480	1	115	11	10	10.8
3469	1	115	15	15	16.7
3347	1	115	20	13	14.5
3474	1	115	17	13	16.3
3703	1	115	18	16	17.1
3139	2	215	14	11	19
3666	1	215	12	11	15.9
3542	1	215	12	11	12.2
3192	2	215	20	16	16.7
3472	1	215	11	8	13.7
3146	2	215	22	19	23.9
3261	2	215	13	9	12.5
3622	1	215	4	1	1.7
3636	1	215	11	8	10.8
3468	1	215	7	6	10.3
3584	1	215	16	11	13.4
3110	2	215	20	19	19.7
3178	2	215	15	15	13.2
3151	1	415	6	6	8.8
3116	1	415	10	9	14.2
3692	1	215	12	12	15.7
3116	2	215	13	12	18.4
3552	1	215	15	14	20.6
3107	2	215	8	7	12
3299	2	215	16	16	23.5
3615	1	215	13	11	18.4
3669	1	215	11	11	15.4
3256	1	215	19	17	22.8
3644	1	215	15	15	19
3506	1	215	15	15	18.7
3296	2	215	14	11	16
3464	1	215	16	16	18.5
3612	1	215	6	6	8.1
3420	2	215	14	14	18.6
3624	1	215	14	14	19.6
3118	2	215	15	12	14.6
3587	1	215	11	7	8
3175	2	215	13	12	17.2
3327	2	215	12	12	18.9
3544	1	215	19	13	16
3547	1	215	10	10	11.2
3283	2	215	19	17	23
3171	2	215	11	11	18.3
3195	2	215	20	15	16.7
3380	1	215	11	11	17.2
3564	1	215	13	9	12.5
3132	2	215	15	14	24.2
3187	2	215	19	17	24.6
3243	2	215	15	15	20.8
3220	2	215	17	16	23.7
3105	2	215	7	6	8.9
3701	1	215	7	7	12
3678	1	215	15	13	14.9
3679	1	215	15	11	17.3
3489	1	215	17	17	21.6
3543	1	215	11	9	13
3533	1	215	17	16	20.6
3100	2	215	13	13	19.7
3631	1	215	12	10	11.3
3664	1	215	14	13	16.7
3659	1	215	16	15	19.2
3645	1	215	14	14	18.6
3745	1	215	13	10	14.7
3680	1	215	12	11	11.8
3315	2	215	9	9	14.6
3213	2	215	14	12	19.4
3768	1	215	15	12	17.6
3117	2	215	16	13	28
3259	2	215	19	19	29.6
3266	2	215	17	16	24.3
3286	2	215	18	12	16.8
3389	2	215	19	18	26.9
3106	2	215	15	15	19.8
3490	1	215	5	5	4.4
3125	2	215	16	16	20.3
3376	2	215	13	13	22.1
3643	1	215	15	15	20
3653	1	215	8	7	8.5
3385	1	215	12	12	19.7
3196	2	215	11	7	5.1
3101	2	215	15	15	20.7
3677	1	215	12	7	10.4
3200	2	215	12	12	15.6
3759	1	215	12	11	14.7
3737	1	215	12	12	18
3630	1	215	14	13	16.8
3742	1	215	12	8	8.6
3290	2	215	16	13	19.9
3639	1	215	17	17	19.6
3723	1	215	9	8	10.8
3370	2	215	4	2	4.5
3364	2	215	16	14	23.1
3825	1	215	16	16	21.2
3817	1	215	15	15	20.8
3884	1	215	17	16	17.7
3619	1	215	8	7	13.2
3384	1	215	19	17	24.1
3401	2	215	13	12	17.5
3652	1	215	11	11	17.4
3562	1	215	17	16	19.2
3780	1	215	19	17	22.4
3183	2	215	4	4	8.5
3112	2	215	15	14	20.8
3651	1	215	13	13	19.1
3563	1	215	18	15	18.6
3387	2	215	16	15	25.9
3176	2	215	19	16	24.4
3059	2	215	18	17	23.1
3367	2	215	13	12	23.2
3108	2	215	11	11	16.5
3321	2	215	11	9	17.7
3871	1	215	11	8	13.8
3333	2	215	23	11	12.8
3697	1	215	16	16	18.8
3484	1	215	9	8	13.8
3635	1	215	13	12	18.4
3875	1	215	17	14	10.7
3826	1	215	14	0	0
3767	1	215	16	13	5.7
3794	1	215	11	6	10
3443	1	215	14	14	22.7
3793	1	215	18	13	16.7
3398	2	215	11	10	17.5
3683	1	215	15	13	8.7
3682	1	215	7	5	8.7
3185	2	215	16	15	8.7
3864	1	215	12	10	8.7
3735	1	215	21	17	8.7
3867	1	215	16	10	8.7
3471	1	215	15	14	8.7
3823	1	215	7	6	8.7
3269	2	215	11	9	8.7
3693	1	215	17	9	20.4
3565	1	215	15	13	24.2
3698	1	215	10	9	18
3869	1	215	13	11	12.9
3667	1	215	15	11	17
3616	1	215	15	14	21.7
3799	1	215	14	13	19.5
3421	2	215	14	11	23.1
3849	1	215	15	14	17.3
3870	1	215	11	11	10.8
3668	1	215	15	12	12.9
3194	2	215	14	14	19.2
3805	1	215	14	13	15.3
3751	1	215	19	18	21.3
3828	1	215	13	13	18
3813	1	215	8	8	14.6
3822	1	215	11	11	12.7
3905	1	215	14	14	12.7
3906	1	215	14	13	18.1
3224	2	215	16	12	19.8
3138	2	215	10	10	16.6
3818	1	215	13	13	19.4
3773	1	215	9	1	1.9
3049	2	215	11	11	21.3
3428	2	215	14	14	19.6
3111	2	215	19	15	23
3246	2	215	14	14	19.2
3426	2	215	18	14	21.8
3473	1	215	13	10	12.2
3787	1	215	9	8	13.5
3405	1	115	7	7	11.5
3440	1	115	10	10	14.4
3812	1	215	11	6	7.9
3391	2	215	15	14	21.3
3821	1	215	17	14	16.1
3509	1	115	7	7	11.1
3145	2	215	16	15	18.7
3167	2	215	17	13	20.1
3102	2	215	19	3	2.8
3216	1	215	16	14	20.2
3463	1	215	11	11	16
3104	2	215	9	8	14.1
3186	2	215	20	17	20.3
3199	2	215	18	14	18.8
3432	1	115	15	13	19.7
3763	1	215	17	16	20.1
3741	1	215	17	14	9.3
3755	1	215	18	15	13.7
3789	1	215	15	13	16.1
3313	2	215	15	15	21.1
3865	1	215	6	0	0
3816	1	215	11	9	11.5
3765	1	215	10	9	15.8
3403	2	215	15	14	16.9
3620	1	215	16	15	20.4
3267	2	215	14	14	22.2
3445	2	215	20	11	16.7
3407	2	215	15	15	22.5
3396	2	215	15	15	22.9
3838	1	215	12	12	19.2
3798	1	215	14	13	18.7
3820	1	215	6	5	7.8
3790	1	215	15	15	22
3874	1	215	15	11	15.5
3835	1	215	15	14	15.3
3493	1	215	15	13	15.9
3746	1	215	13	12	17.1
3430	1	115	8	0	0
3254	1	415	17	16	20.3
3341	2	215	18	16	17.7
3191	2	215	16	13	20.8
3340	2	215	16	15	13.8
3371	2	215	15	14	20.9
3614	1	215	10	8	13.9
3366	2	215	10	10	18.9
3331	2	215	19	13	13.3
3409	2	215	12	12	20.2
3413	2	215	12	12	22.5
3481	1	215	14	14	17.6
3114	2	215	17	17	21.7
3393	2	215	13	12	19
3339	2	215	16	15	21.7
3761	1	215	12	8	13.5
3467	1	215	10	10	16.2
3831	1	215	12	12	18.4
3149	2	215	16	14	24.2
3444	2	215	15	13	21.8
3588	1	215	9	8	18.4
3567	1	215	14	13	17.4
3842	1	215	10	10	18.5
3441	2	215	19	16	22.9
3783	1	215	19	17	19
3757	1	215	15	13	15.9
3323	1	215	17	15	18.4
3781	1	215	14	14	17.2
3786	1	215	12	12	8.3
3098	2	215	14	12	18.3
3646	1	215	11	11	13.2
3873	1	215	6	5	9.6
3223	2	215	14	9	16.8
3876	1	215	19	17	22.8
3925	1	215	14	14	17.6
3814	1	215	10	10	15
3811	1	215	12	11	17.1
3475	1	215	13	11	19.5
3910	1	215	15	14	20.2
3184	2	215	16	14	19
3450	2	215	14	13	17.4
3971	1	215	14	14	15.5
3834	1	215	15	14	18
3180	2	215	19	15	19.7
3986	1	215	14	13	17.2
3880	1	215	15	15	17.2
3585	1	215	15	15	21.6
3926	1	215	7	7	13
3756	1	215	17	17	20.8
3395	2	215	15	11	16.7
3399	2	215	3	3	6.1
3792	1	215	14	12	15.5
3797	1	215	18	14	17.4
3904	1	215	6	4	5.6
3647	1	215	5	4	8.1
3902	1	215	13	9	12.3
3252	2	215	14	14	23.2
3850	1	215	9	6	9.5
3891	1	215	5	3	5.7
4287	1	215	16	9	12.1
3957	1	215	14	13	17.5
3853	1	215	8	6	9.3
3877	1	215	16	15	16.6
3852	1	215	12	12	12.9
3279	2	215	17	14	18.7
3103	2	215	16	14	21.9
3689	1	215	13	13	20.9
3674	1	215	11	10	15.9
3660	1	215	11	11	18.6
3079	1	215	13	9	12.3
4174	1	215	14	13	17
3930	1	215	12	12	19.5
4256	1	215	10	10	14.1
3829	1	215	13	10	17.1
3091	2	215	14	12	17.5
3260	2	215	17	16	24.6
3988	1	215	15	13	14.3
3819	1	215	14	14	19.8
3690	1	215	4	4	8.2
3815	1	215	6	6	11.1
4154	1	215	13	11	13.8
4167	1	215	11	7	11.9
4083	1	215	13	12	14.9
4066	1	215	14	14	19.1
4065	1	215	9	9	9
3959	1	215	15	12	15.2
3313	1	415	18	14	17.1
3726	1	215	8	8	15.2
3289	2	215	18	16	22.3
3254	2	215	8	8	14.4
3662	1	215	15	15	18.6
3498	1	215	11	11	20.2
4056	1	215	15	14	18.9
4309	1	215	3	1	2.1
3851	1	215	13	13	17.2
3594	1	215	19	16	20.8
4159	1	215	13	11	15.1
3903	1	215	5	5	8.6
3824	1	215	6	4	7.6
3837	1	215	12	12	19.7
3885	1	215	12	12	17
4105	1	215	14	13	18
3320	2	215	8	8	13.2
4053	1	215	16	12	20.8
3909	1	215	19	16	20.7
4000	1	215	16	15	21.2
3390	2	215	12	12	19.7
3989	1	215	13	13	15.6
4196	1	215	14	10	16
3878	1	215	13	12	17.9
3788	1	215	9	9	13.9
3435	2	215	11	10	18.4
3369	1	215	14	10	14.9
4184	1	215	11	11	15.7
3629	1	115	10	10	10.1
3201	2	215	13	13	23.2
3408	2	215	11	10	16
3908	1	215	18	12	14.1
3896	1	215	15	13	13.7
3301	2	215	16	15	18.2
4254	1	215	8	8	9.9
4060	1	215	14	13	16
4061	1	215	9	9	15.3
4057	1	215	13	12	15.5
4111	1	215	11	10	15.1
4191	1	215	15	14	17.3
3732	1	215	14	14	17.3
4214	1	215	14	13	16.8
3452	2	215	9	8	15
4093	1	215	14	14	21.3
4295	1	215	11	11	17.5
4226	1	215	14	14	20.6
3419	2	215	15	11	13.8
3832	1	215	17	15	20.3
3956	1	215	12	12	15.5
4082	1	215	12	11	15.9
4115	1	215	13	13	15.1
4381	1	215	9	9	12.5
3883	1	215	10	10	13.5
3942	1	215	13	9	11.3
3992	1	215	15	14	19.6
3990	1	215	15	15	18.3
3060	2	215	14	14	22.5
3892	1	215	15	11	17.7
3750	1	315	9	9	10.8
4307	1	315	15	10	10.6
4177	1	315	13	13	17.5
4145	1	315	7	6	7.9
4293	1	315	17	14	16.9
3982	1	315	13	8	11.9
4172	1	315	13	12	15.6
3466	2	315	16	14	22.7
4155	1	315	11	11	15.1
3346	2	315	19	18	15.5
3144	2	315	12	12	19.4
4363	1	315	11	11	18.1
3868	1	315	10	9	14.9
4173	1	315	9	8	12.6
4396	1	315	9	8	11.9
3791	1	315	14	11	15.7
4123	1	315	15	15	20.9
3427	2	315	13	13	19.8
4058	1	315	10	10	17
4219	1	315	14	13	18.3
4152	1	315	9	9	11.5
4098	1	315	12	12	18.3
3985	1	315	13	10	14.8
4277	1	315	13	10	12.8
4012	1	315	13	11	13.1
4035	1	315	16	14	18.4
4156	1	315	9	8	15.1
4180	1	315	9	9	14.3
3938	1	315	12	12	15.2
3923	1	315	15	15	18.7
3978	1	315	17	17	16.9
4080	1	315	13	13	17
3951	1	315	14	12	15.7
4338	1	315	15	13	14.1
4354	1	315	8	7	10.9
4312	1	315	12	12	15.7
4009	1	315	15	14	15.8
4241	1	315	12	12	12
3948	1	315	13	13	19.7
3375	2	315	15	12	11.8
3952	1	315	12	12	16.9
4166	1	315	4	4	5.8
4005	1	315	13	13	18
4213	1	315	8	7	11.7
3927	1	315	13	13	18.1
3728	1	315	17	17	21.2
3997	1	315	11	11	16.7
4114	1	315	10	9	14.9
4343	1	315	16	16	18.7
3961	1	315	17	12	13.3
3996	1	315	11	11	16.4
4357	1	315	10	10	13.9
4165	1	315	11	9	14.3
4303	1	315	11	8	10.4
4160	1	315	4	4	6.2
4092	1	315	18	11	10.6
4042	1	315	1	1	1.3
3494	2	315	17	15	20.6
3931	1	315	17	17	17.7
4089	1	315	14	14	22.2
3397	2	315	14	14	17.9
4304	1	315	14	14	17.6
4067	1	315	18	18	24.6
3782	1	215	15	13	21.7
3881	1	215	14	11	14.3
3488	2	315	15	15	14.3
4097	1	315	15	13	19.6
4085	1	315	11	10	13.2
3451	2	315	15	8	11.5
3495	2	315	16	16	23.6
4134	1	315	7	7	10.9
4016	1	315	8	8	13.3
4362	1	315	3	3	1.5
4075	1	315	12	12	15.2
4471	1	315	16	15	18.7
4074	1	315	12	12	16.5
4222	1	315	10	8	12.5
4259	1	315	10	9	8.2
4106	1	315	18	15	20.2
4153	1	315	13	12	15.9
4459	1	315	11	11	16.2
3071	3	315	16	15	21
4043	1	315	16	16	18.2
4454	1	315	15	14	21.5
4102	1	315	25	17	18.8
4247	1	315	16	16	18.3
3960	1	315	10	10	14.2
4218	1	315	14	12	18.3
4063	1	315	17	17	23
4399	1	315	10	9	14.3
4122	1	315	12	11	18.3
4070	1	315	16	16	18.9
3922	1	315	11	10	13.5
4021	1	315	14	14	18.4
4286	1	315	14	13	18.7
3939	1	315	14	14	17
3993	1	315	7	3	6.4
4334	1	315	17	17	20.6
3442	2	315	6	4	8.7
4118	1	315	14	12	11.2
4276	1	315	10	9	13.1
4170	1	315	10	9	15.1
3383	2	315	13	11	21.5
4523	1	315	16	15	16.8
3921	1	315	9	7	10.6
4370	1	315	11	11	17.2
3953	1	315	13	13	16.8
4275	1	315	16	11	14.9
4224	1	315	14	13	17.1
4253	1	315	11	11	17.3
4171	1	315	15	12	12.6
4050	1	315	11	11	11.4
3147	3	315	11	11	18.2
4194	1	315	13	13	22.5
4124	1	315	10	10	9.5
4143	1	315	11	9	15.9
3882	1	315	12	10	17.8
4084	1	315	14	13	20.6
4397	1	315	15	13	15.2
4039	1	315	13	13	14.2
3886	1	315	11	11	13.4
3477	2	315	15	14	23.5
3499	2	315	16	15	21.9
3618	1	315	19	15	22.8
3889	1	315	11	11	19.7
4361	1	315	14	14	17.9
3166	2	315	17	14	19
4386	1	315	11	9	16
4428	1	315	9	9	13.4
3994	1	315	15	12	12.7
3963	1	315	16	14	14.3
4474	1	315	6	6	6.9
3479	2	315	12	12	14
4554	1	315	14	13	17.2
4453	1	315	13	13	21.3
4169	1	315	13	11	17.8
4062	1	315	11	10	17.3
4047	1	315	13	13	15.3
3991	1	315	14	13	18.7
4137	1	315	17	15	17.8
4479	1	315	16	16	17.3
4185	1	315	13	13	17.5
4059	1	315	16	16	19.3
4476	1	315	13	11	12.9
4069	1	315	15	14	14.9
3734	1	315	17	15	21.5
4225	1	315	15	14	19.8
4011	1	315	14	13	17.1
4071	1	315	15	12	13.3
3924	1	315	12	12	17.4
3984	1	315	4	3	4.3
4280	1	315	11	8	10.2
3944	1	315	10	9	15.7
4131	1	315	11	9	15.7
4048	1	315	15	15	19.3
3297	2	315	13	12	20.1
3485	2	315	3	3	6.2
4091	1	315	8	7	10.4
4128	1	315	11	10	14.4
4461	1	315	14	13	16
4182	1	315	17	13	15.2
4032	1	315	16	12	17.1
3470	2	315	18	18	23.5
4350	1	315	13	12	20.1
4347	1	315	10	9	14.9
4126	1	315	13	12	18.7
4051	1	315	11	9	11.3
4339	1	315	8	7	10.1
4269	1	315	11	11	15.2
4030	1	315	5	5	7.6
4439	1	315	9	9	15.9
4116	1	315	11	11	16.8
4136	1	315	15	13	16.8
4158	1	315	11	10	17
4090	1	315	14	13	17.9
4120	1	315	14	14	18.2
4157	1	315	14	14	18.9
4302	1	315	14	12	17
3507	2	315	15	15	22.9
4415	1	315	13	12	17.6
4079	1	315	6	6	10.6
4480	1	315	14	13	16.1
3932	1	315	16	16	20.2
4223	1	315	14	10	14.5
4440	1	315	13	10	14.2
4285	1	315	20	14	18
4036	1	315	17	16	23
4335	1	315	10	10	15.6
4401	1	315	16	16	19.5
4112	1	315	15	15	21.7
4109	1	315	15	14	16.2
4260	1	315	17	17	22.8
4121	1	315	14	14	21.1
4133	1	315	13	10	15.8
4409	1	315	15	15	19.2
4419	1	315	13	12	19.8
4119	1	315	14	12	17.9
4193	1	315	15	15	19.9
4192	1	315	17	17	20.7
3589	2	315	13	13	19.4
4545	1	315	12	12	18.7
3536	2	315	16	14	17.3
4094	1	315	15	13	18.2
3322	2	315	18	16	26.1
4478	1	315	11	8	9.9
3936	1	315	10	10	10.7
3497	2	315	6	5	11.6
3685	2	315	13	12	17.7
4466	1	315	16	14	19.2
3438	2	315	17	12	16.8
4313	1	315	17	12	12.9
3400	2	315	9	9	18.5
3945	1	315	16	15	24.5
4327	1	315	20	19	23.8
4125	1	315	9	7	8.4
4262	1	315	15	10	12.2
4524	1	315	15	14	16.9
4489	1	315	20	19	17.8
4549	1	315	13	11	15.6
3962	1	315	19	12	13.9
4477	1	315	11	9	9.6
4482	1	315	13	12	13.2
3465	2	315	8	6	9.3
3966	1	315	11	11	16.4
4553	1	315	15	14	19.1
4497	1	315	14	14	17.1
3950	1	315	17	16	14.4
4014	1	315	12	11	15.2
4187	1	315	15	14	15.8
3174	2	315	16	16	18.6
4283	1	315	15	14	17.1
4495	1	315	16	5	8.8
4168	1	315	14	14	16.3
4467	1	315	5	4	7.5
3480	2	315	16	15	21.2
4073	1	315	13	13	20.2
4006	1	315	20	18	20.7
4232	1	315	17	14	19.6
3995	1	315	12	9	19.6
4329	1	315	16	16	19.4
4026	1	315	17	15	20.9
3638	2	315	15	15	19.4
3648	2	315	15	14	19.7
4550	1	315	14	12	17.6
4176	1	315	13	12	19.8
4202	1	315	14	14	18.6
4470	1	315	14	12	14.2
4284	1	315	12	12	14.2
4517	1	315	9	9	14.1
4297	1	315	12	12	18.9
3946	1	315	13	12	15.5
4570	1	315	18	16	19.4
4400	1	315	13	13	20.2
3949	1	315	13	12	14.7
3958	1	315	15	13	19.9
3405	2	315	12	12	20.3
3681	2	315	14	13	17.9
4544	1	315	7	6	9.2
4019	1	315	11	11	20.1
4491	1	315	12	12	17.4
4552	1	315	17	17	21.8
4499	1	315	11	11	14
4289	1	315	13	13	13.2
3509	2	315	9	9	13.9
3975	1	315	19	17	20.7
4528	1	315	13	12	15.2
4353	1	315	11	11	18.6
4138	1	315	16	14	19.1
4533	1	315	8	8	12.9
4538	1	315	17	15	18.8
3469	2	315	15	5	7.7
4468	1	315	17	14	14.5
4574	1	315	15	14	17.6
4753	1	315	20	20	21.9
4516	1	315	14	14	17.1
4052	1	315	11	9	14
4013	1	315	10	10	16.1
4504	1	315	10	10	15.5
4095	1	315	18	17	22.7
4010	1	315	11	11	16.1
3976	1	315	17	16	24.1
4273	1	315	21	19	23.3
4435	1	315	15	15	18.2
3347	2	315	21	15	19.2
3404	2	315	16	12	15.3
4529	1	315	13	13	18.9
3827	1	315	13	13	18.6
4221	1	315	9	9	18.5
4410	1	315	15	14	16.2
4355	1	315	14	12	17.8
4366	1	315	15	15	13.1
4568	1	315	9	8	9.9
3915	1	315	17	13	15.6
4020	1	315	12	11	19.1
4426	1	315	20	16	15.6
4033	1	315	18	16	17
4251	1	315	8	8	14.5
4625	1	315	19	18	27.4
4412	1	315	8	8	12.9
4113	1	315	16	13	16.3
4332	1	315	14	14	19.4
4393	1	315	12	12	19.3
4535	1	315	11	11	18.2
4211	1	315	14	13	20.7
4300	1	315	6	6	10.5
4025	1	315	20	15	22.2
3196	1	415	22	13	19.5
3048	2	415	17	12	14.9
4101	1	315	14	9	11.7
4617	1	315	14	9	11.7
4635	1	315	12	10	17.3
4390	1	315	13	13	16.9
4615	1	315	16	15	13.8
3498	2	315	13	13	23.7
4472	1	315	14	13	19.5
4662	1	315	22	20	23.3
4571	1	315	14	12	17.1
4752	1	315	11	11	18.2
4889	1	315	17	16	25
4628	1	315	18	13	18.5
4250	1	315	14	14	15.8
4587	1	315	5	5	6.7
4928	1	315	8	7	10
4756	1	315	15	14	18
4508	1	315	19	19	23.5
4110	1	315	19	18	22.6
4866	1	315	14	13	18.3
4041	1	315	22	21	23.5
4072	1	315	15	15	20.3
4693	1	315	14	12	17.9
4675	1	315	5	5	8.2
4681	1	315	12	12	13.1
4610	1	315	8	8	9.7
4569	1	315	10	10	13.8
4204	1	315	12	11	16.4
4438	1	315	19	16	23.1
4279	1	315	10	10	18.4
4729	1	315	11	10	15.3
4876	1	315	6	5	6.9
3151	3	315	20	15	17.8
3703	2	315	18	16	21
3261	3	315	13	11	17.3
3146	3	315	19	17	17.9
3983	1	315	13	12	20.4
4634	1	315	10	8	9.6
4619	1	315	12	12	16.3
4278	1	315	3	3	5.5
4592	1	315	13	11	15.8
4631	1	315	9	9	16.5
4579	1	315	13	12	15.9
4813	1	315	11	10	13.4
4589	1	315	12	12	16.1
4519	1	315	10	8	12.3
4824	1	315	11	8	11.4
4054	1	315	11	10	17.4
4175	1	315	14	12	14.2
3987	1	315	13	13	21.7
3372	2	315	10	10	18.3
4802	1	315	8	8	11.8
4593	1	315	16	16	23.1
4800	1	315	16	14	15.7
4792	1	315	14	13	17.6
3947	1	315	17	13	16.8
4473	1	315	12	12	16
3629	2	315	16	15	17.5
3934	1	315	17	14	16.3
4622	1	315	7	7	7.8
3941	1	315	16	14	14
4027	1	315	16	15	20.4
3355	2	315	19	12	21.9
3279	3	315	14	12	19.1
4737	1	315	9	8	10.4
4706	1	315	19	18	19.6
4690	1	315	17	14	18.8
4680	1	315	14	10	10.9
4636	1	315	16	13	17
3296	3	315	14	14	23.8
3429	2	315	17	15	20.5
4515	1	315	11	11	12.7
4227	1	315	17	14	21.3
3091	3	315	16	15	22.6
4694	1	315	16	16	26.4
4698	1	315	8	6	8
3283	3	315	18	18	25.4
4713	1	315	8	8	10.1
4730	1	315	14	14	20.9
3171	3	315	16	12	19.9
4164	1	315	14	13	21.4
3327	3	315	13	9	12.7
4216	1	315	5	4	6.3
4692	1	315	11	8	13
4513	1	315	16	16	19.5
3103	3	315	20	15	19.8
3220	3	315	17	16	20.5
4623	1	315	13	12	20.9
3187	3	315	16	13	15.5
3100	3	315	11	11	19.2
3243	3	315	7	7	11.6
4668	1	315	13	11	20
3200	3	315	10	10	13.6
4627	1	315	9	8	14.3
4608	1	315	17	15	19.6
4785	1	315	13	13	20.4
4427	1	315	16	15	21
4292	1	315	14	14	20.4
4463	1	315	19	19	22.1
4714	1	315	9	9	12.7
4882	1	315	11	11	13.8
4683	1	315	10	10	13.1
4252	1	315	11	10	13.2
4352	1	315	3	2	3.7
4148	1	315	10	10	17.4
4243	1	315	24	19	22.1
3378	2	315	13	13	17.9
3463	2	315	15	15	23.3
4356	1	315	13	13	14.1
3213	3	315	18	17	21.3
5061	1	315	16	15	14.4
3689	2	315	13	12	20.3
3389	3	315	22	18	22.9
3106	3	315	15	14	18.7
3259	3	315	17	15	20.1
4040	1	315	14	11	14.8
3079	2	315	14	11	17.7
4107	1	315	14	13	15.7
4987	1	315	8	5	5.9
3376	3	315	20	20	23.2
4239	1	315	14	14	18.8
4431	1	315	15	15	20.5
4749	1	315	8	3	2.4
4088	1	315	12	12	19.9
4231	1	315	14	14	16.7
4288	1	315	14	13	18.5
3669	2	315	10	10	13
4311	1	315	13	13	14.9
4745	1	315	11	11	18.7
4586	1	315	14	12	13.8
3175	3	315	18	17	25
4228	1	315	19	19	24
4162	1	315	18	16	19.5
3132	3	315	20	17	20.4
4704	1	315	16	13	16.1
4543	1	315	14	13	18.5
4920	1	315	16	14	19.1
4688	1	315	16	14	24.8
3199	3	315	16	16	19
4469	1	315	13	12	14.9
4458	1	315	13	13	17.8
4871	1	315	14	13	15.8
4870	1	315	12	9	12.5
4872	1	315	14	13	18.5
4754	1	315	18	18	19.4
3464	2	315	14	14	21.1
3612	2	315	7	7	9.9
3118	3	315	16	15	19.9
4007	1	315	13	13	16.4
3678	2	315	14	13	17.9
3544	2	315	15	11	19
3679	2	315	10	10	16.6
3547	2	315	8	8	9.9
3256	2	315	15	15	28
4299	1	315	13	13	17.3
4620	1	315	13	12	14.6
4906	1	315	15	15	18.9
4759	1	315	17	12	17
4911	1	315	15	6	7.6
4883	1	315	14	14	17.1
4626	1	315	15	15	24.6
4667	1	315	6	6	10.4
3167	3	315	15	14	21.5
3701	2	315	19	18	26.3
3631	2	315	11	10	12.4
4446	1	315	10	5	7.6
3680	2	315	12	11	14.2
4449	1	315	18	17	20.8
4816	1	315	12	12	17.3
4616	1	315	8	8	10.3
4108	1	315	12	9	10.4
4669	1	315	14	12	20.4
3542	2	315	14	14	19.6
4932	1	315	11	8	9.5
4736	1	315	15	11	16.2
4695	1	315	14	13	15.2
4903	1	315	17	16	21.4
4815	1	315	16	14	20.9
3543	2	315	13	11	17.6
3472	2	315	9	8	12.5
3664	2	315	19	16	16.1
3116	3	315	19	17	21.4
4624	1	315	13	13	20.5
3145	3	315	19	9	8.9
4865	1	315	12	9	15
3666	2	315	13	13	20.3
4905	1	315	18	17	21.7
4890	1	315	15	14	14.6
4784	1	315	12	1	0.9
4237	1	315	13	13	20.9
3645	2	315	12	12	17.6
4943	1	315	13	13	16.6
4310	1	315	16	13	15.7
3192	3	315	14	14	14.3
4703	1	315	13	13	18.6
4778	1	315	7	6	10.3
4748	1	315	17	15	16.6
4595	1	315	15	11	14.4
4498	1	315	13	9	20
4527	1	315	13	12	16.9
3490	2	315	9	5	6.8
3162	2	315	7	1	1.9
4584	1	315	12	12	15.7
3907	1	315	11	11	16.5
4281	1	315	14	9	9.3
4758	1	315	15	15	17.2
4240	1	315	10	10	15.8
4820	1	315	9	8	12.6
3506	2	315	24	18	22.9
4837	1	315	13	13	15.7
3552	2	315	20	19	26.6
4135	1	315	5	5	10.1
4360	1	315	16	15	24.2
4465	1	315	11	11	11.1
4795	1	315	12	7	22.4
4432	1	315	13	8	13.5
4760	1	315	13	12	18.2
4117	1	315	13	12	17
4599	1	315	12	12	16.6
4132	1	315	11	10	13.9
4547	1	315	19	19	18.8
4382	1	315	14	12	18.5
3615	2	315	13	12	21.1
4437	1	315	6	5	9.9
4542	1	315	10	9	14.3
4743	1	315	10	10	18.3
4684	1	315	10	10	14.7
3110	3	315	18	18	20.7
3299	3	315	18	15	19.6
3584	2	315	14	14	16.6
3692	2	315	15	12	17.8
3644	2	315	17	16	21.2
3468	2	315	13	13	19
3636	2	315	14	14	19.2
4907	1	315	12	12	18.2
4676	1	315	13	12	16.3
4230	1	315	7	7	13.4
4832	1	315	18	17	18.5
4077	1	315	10	10	13.8
4682	1	315	16	16	20.1
4718	1	315	11	11	16.1
4697	1	315	13	13	16.2
4443	1	315	15	15	22.1
3660	2	315	10	9	14.6
3101	3	315	13	10	16.3
3286	3	315	15	14	16.9
3125	3	315	17	15	22
3333	3	315	21	11	14.7
5050	1	315	14	14	17.2
4700	1	315	7	7	11.1
3266	3	315	14	12	19.7
3343	2	315	17	16	21.3
4186	1	315	22	17	18.1
4885	1	315	13	12	15.7
4687	1	315	9	7	11.8
4558	1	415	15	12	11.3
4888	1	415	13	13	17.1
4909	1	415	16	16	20.8
4959	1	415	14	10	14.5
4712	1	415	7	7	9.8
4677	1	415	7	7	16.9
3487	2	415	12	12	18.3
3535	2	415	14	13	17.2
4967	1	415	13	11	13.8
4611	1	415	16	16	18.3
3723	2	415	2	1	1.8
3742	2	415	16	11	9.8
5049	1	415	4	4	4.2
3823	2	415	12	11	14.9
4696	1	415	13	12	16.7
5006	1	415	18	17	23.7
4701	1	415	12	12	14.1
4790	1	415	18	17	21.8
4509	1	415	17	16	19.8
4956	1	415	15	15	21.8
4986	1	415	15	15	22.9
4933	1	415	18	18	20.3
4854	1	415	7	6	9
3871	2	415	8	8	12.6
5182	1	415	15	13	18.1
3563	2	415	19	19	25.2
3331	3	415	24	16	13.2
4814	1	415	15	11	15.7
3698	2	415	19	17	18.7
3112	3	415	20	19	20.8
3176	3	415	15	13	18.7
4031	1	415	21	18	16.6
4539	1	415	13	13	17.6
3773	2	415	15	13	16.8
4448	1	415	15	12	13.8
3726	2	415	12	11	17
3822	2	415	9	9	12.9
4534	1	415	20	16	14.6
4834	1	415	13	13	15.1
5035	1	415	14	14	18
3367	3	415	14	14	24.1
3059	3	415	15	15	17.5
3108	3	415	12	10	13.9
3565	2	415	15	14	21
3831	2	415	17	16	22.1
4817	1	415	4	4	5.9
4925	1	415	17	17	18.5
4673	1	415	16	14	15.3
5025	1	415	13	11	10.1
4942	1	415	17	14	16.7
4944	1	415	12	12	13.1
4856	1	415	8	8	11
4898	1	415	2	2	2.9
4716	1	415	9	9	14.9
3484	2	415	12	11	15.8
3697	2	415	13	10	12.8
4919	1	415	13	11	14.4
5116	1	415	6	6	9.4
4826	1	415	11	10	11.8
4740	1	415	12	10	14.5
3562	2	415	15	15	20.5
3387	3	415	14	12	18.7
3398	3	415	16	15	19.5
4751	1	415	16	14	18
3793	2	415	19	15	19.2
3481	2	415	20	17	18.6
3635	2	415	16	15	19
4789	1	415	13	12	15
5101	1	415	20	3	3.5
4923	1	415	7	5	4
3875	2	415	11	10	16.4
4821	1	415	5	0	0
4869	1	415	14	13	18.3
4621	1	415	14	14	14.3
3114	3	415	13	13	15.7
3812	2	415	8	8	11.2
3799	2	415	16	16	21
4457	1	415	12	11	14.8
3444	3	415	18	16	18.4
4139	1	415	7	6	8.8
5130	1	415	13	13	15.1
4576	1	415	11	10	14.5
4849	1	415	17	14	16.8
3758	2	415	4	2	2.7
4380	1	415	9	9	11.2
4844	1	415	15	14	15.5
5063	1	415	11	10	10.4
5200	1	415	16	15	14.2
4910	1	415	9	7	7.4
4884	1	415	17	13	11.3
4305	1	415	17	17	19.1
4897	1	415	17	17	20.2
4787	1	415	16	16	19.5
4948	1	415	10	10	14.6
4488	1	415	11	11	14.5
4864	1	415	16	16	17.2
4537	1	415	17	16	19.2
4686	1	415	12	10	12.6
5152	1	415	6	5	5.8
3817	2	415	13	13	18.1
3339	3	415	19	18	16.9
3826	2	415	9	9	16.3
3639	2	415	15	15	17.3
3413	3	415	15	13	19.9
3624	2	415	16	16	24.6
4417	1	415	17	17	19.1
4518	1	415	11	10	16.8
4947	1	415	8	8	12.6
4926	1	415	11	10	14.8
4875	1	415	14	12	15
4763	1	415	11	10	3.3
4845	1	415	13	11	15.4
4924	1	415	12	12	17.4
4918	1	415	5	5	7.4
4656	1	415	8	8	13.2
4825	1	415	10	10	16.9
4989	1	415	9	8	9.4
4674	1	415	17	16	21.1
4783	1	415	12	9	14.2
3191	3	415	11	11	17.9
3409	3	415	3	3	16.9
4874	1	415	11	9	11.1
3825	2	415	15	14	18
3371	3	415	12	11	19.7
3630	2	415	10	10	17.2
3651	2	415	14	14	20.8
3341	3	415	15	15	17
3652	2	415	12	11	15.7
3401	3	415	15	13	21.5
4129	1	415	17	16	20.2
3867	2	415	15	14	10.8
4742	1	415	10	9	15.5
3138	3	415	14	13	18
4520	1	415	14	10	16
5009	1	415	6	6	9.6
4804	1	415	13	13	19.3
4614	1	415	21	18	15.4
4506	1	415	13	13	18.3
3340	3	415	14	14	14.2
4429	1	415	12	12	19
4315	1	415	8	8	10.5
3366	3	415	16	16	21.9
4416	1	415	10	10	15.4
3533	2	415	19	18	24.1
3224	3	415	16	13	21.9
4850	1	415	11	10	14.1
3787	2	415	15	15	21
3614	2	415	13	10	16.2
3906	2	415	17	15	16.5
3735	2	415	20	18	20
4953	1	415	15	10	28.6
3905	2	415	13	13	15.5
3683	2	415	14	13	22.6
4880	1	415	10	8	11
3428	3	415	15	15	19.7
3818	2	415	15	13	18
4892	1	415	16	16	17.4
4572	1	415	15	15	28.6
4819	1	415	10	8	28.6
3954	1	415	16	16	28.6
4585	1	415	14	11	28.6
4991	1	415	14	11	28.6
4912	1	415	11	10	28.6
4672	1	315	13	13	17.4
4633	1	315	21	19	21.1
4782	1	315	11	11	14.2
4323	1	315	13	11	18.5
4630	1	315	16	14	21.1
4732	1	315	3	2	3.1
3955	1	315	6	6	10.5
4738	1	315	12	12	12.5
4430	1	315	16	16	23.1
4741	1	315	11	11	15.8
5027	1	315	14	12	17.4
4935	1	315	13	10	14.1
3659	2	315	19	17	19.4
3662	2	415	14	14	18.4
3185	3	415	15	15	22.2
3060	3	415	17	17	20.9
3049	3	415	11	11	21.2
3246	3	415	21	19	25.4
3736	2	415	17	16	21.7
5113	1	415	13	10	14.9
5055	1	415	9	8	9.8
4806	1	415	12	11	16.9
3426	3	415	15	14	20.3
4375	1	415	8	7	9.7
4551	1	415	12	12	14.7
3865	2	415	10	10	14.4
3476	2	415	18	17	23.8
3864	2	415	8	8	15.1
3759	2	415	17	17	28.6
3393	3	415	10	10	17.1
3884	2	415	13	12	19.5
4689	1	415	15	12	16
4532	1	415	16	15	16.3
4444	1	315	15	13	17.4
4968	1	315	7	7	10.8
3290	3	415	9	8	9.5
5036	1	415	13	10	12.2
4914	1	315	10	9	11.5
4852	1	315	14	14	17.6
4887	1	315	16	16	22.7
4755	1	315	12	10	15.5
4823	1	315	10	10	18.2
4613	1	315	15	14	18.2
4805	1	315	16	13	15.6
4757	1	315	3	3	6.1
4810	1	315	12	10	18.7
4507	1	315	13	12	17.8
4555	1	315	13	13	17.3
4433	1	315	9	9	14.6
3653	2	315	4	4	7.1
3763	2	415	15	13	16.7
3643	2	315	8	8	13.1
4893	1	315	11	9	15.5
4809	1	315	12	9	12.5
4238	1	315	15	13	18.1
4130	1	315	12	12	16
4596	1	315	13	12	12.9
4859	1	415	13	13	18.2
4394	1	415	10	10	16.8
4927	1	415	12	11	13.9
4068	1	415	13	13	18.5
4691	1	415	14	14	19.5
4328	1	415	17	16	20.7
4481	1	415	12	12	16.7
4833	1	415	6	6	10.6
4604	1	415	13	12	15.3
3564	2	415	20	18	21.6
3474	2	415	14	14	23.1
4739	1	415	15	13	22.4
3380	2	415	20	15	19.9
4540	1	415	12	12	17.1
4842	1	415	12	12	17.6
4922	1	415	13	13	15.9
4786	1	415	15	15	19.1
4475	1	415	16	16	18.2
4973	1	415	18	14	18
4840	1	415	14	14	21.6
3767	2	415	19	18	19.8
4801	1	415	15	15	16.9
4719	1	415	12	11	18.1
5098	1	415	21	19	17.5
3195	3	415	21	21	23.2
4836	1	415	14	13	16.7
3364	3	415	13	12	16.5
4981	1	415	8	8	10.8
4629	1	415	6	6	12.2
4265	1	415	16	16	18
3450	3	415	8	8	14.8
3821	2	415	13	13	14.8
3391	3	415	13	13	19.7
5121	1	415	15	12	17.2
4803	1	415	11	11	15.9
4955	1	415	10	8	8.4
5083	1	415	17	14	15
4531	1	415	12	12	15.2
4147	1	415	9	8	8.2
3483	2	415	10	10	14.4
4877	1	415	12	12	17.9
5123	1	415	11	10	13
4671	1	415	14	14	20.5
3396	3	415	13	13	17.7
3313	3	415	15	13	18.6
4046	1	415	20	19	20.8
3445	3	415	17	16	21.5
3682	2	415	12	12	22.1
3849	2	415	11	11	18.9
3620	2	415	6	6	9.6
3765	2	415	14	13	23.3
3267	3	415	17	16	22.4
3289	3	415	16	15	18.1
4733	1	415	4	4	6.7
5105	1	415	15	14	19.8
5107	1	415	16	14	14.5
5072	1	415	10	9	11.8
4462	1	415	16	15	21.8
5097	1	415	10	10	14.7
4945	1	415	11	11	14.1
4896	1	415	15	14	21.3
4096	1	415	17	15	20.3
5005	1	415	14	14	15.8
5053	1	415	4	3	5.5
4282	1	415	17	16	23.1
4902	1	415	16	16	19.4
4000	2	415	10	9	11.4
4346	1	415	6	4	7.7
3407	3	415	14	13	21.4
4140	1	315	14	14	18.1
4530	1	415	14	12	17.4
5218	1	415	16	16	20.8
5077	1	415	13	13	12.9
3741	2	415	16	15	21.7
5041	1	415	18	18	21.9
4807	1	415	13	11	16.7
5134	1	415	4	4	7.5
3667	2	415	20	18	24
4418	1	415	12	12	14.7
4835	1	415	11	11	17.9
4846	1	415	13	13	14
4828	1	415	14	12	12.6
5140	1	415	4	0	0
4878	1	415	18	15	17.4
3820	2	415	14	13	20.1
5332	1	415	14	13	11.1
3211	2	415	17	17	18
4769	1	415	19	16	17.2
3370	3	315	15	15	22.2
4181	1	415	12	10	9.6
4938	1	415	7	5	6
3737	2	415	16	13	18.3
5271	1	415	13	12	14.7
5100	1	415	14	13	12.6
5122	1	415	14	13	15
4843	1	415	17	16	19.5
4913	1	415	13	13	13.1
5288	1	415	12	8	11.1
4901	1	415	13	13	14.5
5012	1	415	18	16	17.7
5262	1	415	12	12	17.2
3798	2	415	12	12	16.5
3794	2	415	17	16	21.1
3489	2	415	22	17	17.1
3838	2	415	14	14	21.3
4977	1	415	18	16	19.9
5081	1	415	18	16	19.2
3443	2	415	15	12	16.9
4612	1	415	17	17	23.8
3874	2	415	13	12	18.2
3321	3	416	15	14	18
3567	2	416	10	10	17.1
4988	1	416	16	16	19.8
5000	1	416	14	14	21.6
5219	1	416	15	15	14.9
5212	1	416	14	12	15.6
4966	1	416	13	8	11.2
5281	1	416	10	10	14
5279	1	416	3	3	4.8
3269	3	416	12	11	14.1
3757	2	416	17	17	20.6
3149	3	416	18	15	20.3
3201	3	416	10	10	18.5
5223	1	416	13	10	12
5214	1	416	16	13	14.7
3824	2	416	13	11	15.2
5091	1	416	11	9	11.3
5181	1	416	18	18	24.9
5211	1	416	12	10	13.1
5024	1	416	10	7	12.7
4342	1	416	9	9	15.3
4934	1	416	17	12	14.1
4960	1	416	15	15	15.9
4848	1	416	13	8	7.9
3260	3	416	13	13	19.9
3869	2	416	16	14	14.9
5305	1	416	11	10	15
3139	3	415	22	7	8.5
4359	1	415	10	8	12.9
4577	1	415	18	18	18.2
5231	1	416	12	11	15.1
5303	1	416	11	11	14.1
5071	1	416	9	9	16.2
4242	1	416	16	16	19.8
4862	1	416	16	13	13.6
5207	1	416	17	15	18.1
3746	2	415	14	14	19.7
5243	1	416	13	11	11.8
5189	1	416	7	7	9.7
5210	1	416	16	12	15.1
5277	1	416	19	19	18.6
4566	1	416	21	17	17.9
5128	1	416	10	10	14.1
4891	1	416	8	8	8.5
4830	1	416	11	11	15.5
4900	1	416	9	9	11.2
5013	1	416	11	9	14.6
5177	1	416	13	12	17
5276	1	416	11	10	14.1
5283	1	416	10	0	0
5103	1	416	13	12	18.7
3441	3	416	7	7	12.5
3790	2	416	13	13	20.8
3186	3	315	13	13	19.3
4750	1	315	14	14	22.7
4775	1	315	14	2	2.8
4908	1	315	12	12	14.3
4291	1	415	12	0	0
3842	2	416	11	11	18.3
3319	2	416	15	8	11.4
3399	3	416	4	4	7.2
3180	3	416	13	9	11.8
3395	3	416	22	18	22.9
4970	1	416	9	8	11.8
5146	1	416	15	13	14.8
5240	1	416	14	13	15.4
5047	1	416	12	11	15
4946	1	416	18	18	24.2
4808	1	416	14	12	13.5
4715	1	416	18	18	18
5090	1	416	14	10	14.2
5127	1	416	18	14	17.5
5157	1	416	19	14	15.8
5232	1	416	19	17	20.4
3768	2	315	18	17	21.6
5088	1	416	16	13	13.9
4969	1	416	11	11	16.4
4858	1	416	10	9	9.2
3925	2	416	10	10	15
3223	3	416	17	15	20.6
3756	2	416	13	11	15.9
3891	2	416	16	12	17.1
5275	1	416	14	13	18.5
3585	2	416	16	16	22.5
3786	2	416	16	15	20.4
5015	1	416	12	11	14.5
3493	2	416	18	16	24.2
3880	2	416	18	17	22.5
3902	2	416	14	14	19.4
3646	2	416	21	19	17.7
3616	2	416	7	7	10.1
3792	2	416	12	8	10.5
3876	2	416	15	15	25.6
3797	2	416	18	17	21.8
5282	1	416	8	5	5.7
3067	2	416	17	16	20.1
5274	1	416	11	10	12.9
4841	1	416	18	16	24.6
5294	1	416	18	16	20.7
5106	1	416	17	15	18.5
3926	2	416	10	10	16.2
5186	1	416	18	15	19.2
5238	1	416	16	9	10.7
5215	1	416	13	12	19.7
3881	2	416	16	13	16.6
3674	2	416	17	17	24.3
3829	2	416	12	11	16.6
3850	2	416	16	9	10.3
3877	2	416	22	19	19.8
4287	2	416	12	12	15.9
3853	2	416	18	18	22.2
3252	3	416	17	17	23.4
3647	2	416	16	13	17.4
3863	1	416	4	4	8.8
3834	2	416	11	10	12
5456	1	416	12	12	16.9
4274	1	416	17	17	22
5183	1	416	20	19	25.1
5187	1	416	11	10	14.9
5224	1	416	12	11	14.1
5178	1	416	16	15	17.9
5017	1	416	11	11	13.8
4861	1	416	13	12	14.1
5209	1	416	9	9	8.9
5087	1	416	11	10	11.4
4860	1	416	16	13	17.8
5233	1	416	14	7	10.7
4559	1	416	10	10	12.9
5118	1	416	13	12	12.5
5213	1	416	16	16	19.2
5126	1	416	12	11	15.5
4812	1	416	16	12	15.9
4931	1	416	13	12	15.9
5079	1	416	15	15	18.9
5228	1	416	16	14	16.4
5197	1	416	12	12	16.6
5293	1	416	14	13	18.8
3781	2	416	8	7	13
5060	1	416	16	12	18.6
4661	1	416	15	13	17.9
3971	2	416	16	16	14.4
5236	1	416	18	15	17.4
4065	2	416	14	12	14.3
3819	2	416	17	16	18.8
5453	1	416	16	15	19.1
3892	2	416	16	14	20.5
5452	1	416	16	14	17.8
5489	1	416	12	11	16
3904	2	416	13	11	14.8
5016	1	416	14	12	17
4857	1	416	20	20	21.3
4066	2	416	16	16	19.6
4083	2	416	14	14	17.9
4056	2	416	15	15	22.4
4921	1	416	8	7	8.1
4154	2	416	15	14	18
4309	2	416	12	12	19.6
5234	1	416	13	12	15.7
4976	1	416	17	15	17.1
3909	2	416	13	13	20
3690	2	416	12	10	18.1
3761	2	416	19	12	16.9
3852	2	416	19	16	20.9
4895	1	416	6	6	8.9
4053	2	416	6	6	12
4105	2	416	15	14	20.4
3989	2	416	17	16	20.5
4256	2	416	14	13	19.6
4174	2	416	13	12	11.5
4930	1	416	15	12	18.4
4998	1	416	14	11	13.5
5235	1	416	18	12	15.4
3369	2	416	18	18	27
5080	1	416	14	13	18.6
4167	2	416	17	14	19.4
3957	2	416	11	11	19.9
3903	2	416	6	6	10
3390	3	416	19	17	22.5
3619	2	416	14	14	24.8
4196	2	416	14	14	19.2
5046	1	416	7	7	7.5
5261	1	416	10	0	0
3959	2	416	12	12	20.4
4349	1	416	14	14	20.8
4868	1	416	14	13	19.1
5111	1	416	12	10	12.3
4855	1	416	2	2	4.2
5176	1	416	16	16	19.7
5162	1	416	11	11	12.2
4949	1	416	14	12	10.3
5258	1	416	7	7	10.9
4958	1	416	13	13	18.8
3910	2	416	10	10	13.3
4384	1	416	14	13	18.7
4080	2	416	5	5	11.3
5137	1	416	11	11	13.7
4917	1	416	5	2	2.6
5099	1	416	21	20	23.2
5194	1	416	20	19	22.8
3098	3	416	12	10	19.6
5096	1	416	9	9	11.6
5320	1	416	13	13	17.7
3184	3	416	15	15	21.1
5040	1	416	13	13	12.2
4060	2	416	18	18	19.4
5250	1	416	10	9	13
5142	1	416	16	13	21.5
4436	1	416	16	11	10.4
3998	1	416	13	12	17.5
4936	1	416	14	12	14
5023	1	416	13	12	17.4
5497	1	416	14	14	17.3
5307	1	416	17	15	14.5
3301	3	416	17	17	20.1
3832	2	416	18	16	21.9
5039	1	416	15	14	21.7
5457	1	416	17	17	23.5
5302	1	416	13	13	18.1
5330	1	416	11	10	15.2
5254	1	416	13	12	15.1
5341	1	416	13	13	18.5
3956	2	416	12	12	17.9
5495	1	416	16	14	16.7
4057	2	416	17	17	22.6
3992	2	416	14	14	20.4
4226	2	416	14	14	19.6
4061	2	416	18	14	19.6
4082	2	416	18	17	23.5
5499	1	416	11	10	15
5469	1	416	12	10	13.9
4411	1	416	18	16	19.2
5493	1	416	11	11	12.5
5368	1	416	11	10	11.4
5132	1	416	19	18	19.9
3908	2	416	11	10	18.5
5476	1	416	16	14	18.8
5042	1	415	14	14	17.7
4779	1	415	12	0	0
5393	1	416	12	11	12
5485	1	416	17	14	18.4
5516	1	416	11	10	13.7
4997	1	416	20	17	19.3
5424	1	416	8	8	9.8
5367	1	416	12	11	14.9
4295	2	416	14	14	16.1
3896	2	416	17	12	14.9
4963	1	416	16	16	16.2
3878	2	416	14	13	15.1
5334	1	416	14	14	17.4
4184	2	416	5	5	9
4338	2	416	2	2	3.6
4254	2	416	11	11	14.8
5503	1	416	8	7	12
4115	2	416	14	13	16.8
4316	1	416	12	12	16.9
5525	1	416	13	10	16.6
5524	1	416	13	13	16.4
4093	2	416	20	18	19.1
4982	1	416	12	8	7.4
5390	1	416	14	13	16
5115	1	416	12	11	15.8
5506	1	416	14	14	18.1
5141	1	416	20	19	24
5085	1	416	15	13	17.4
3883	2	416	14	13	20.2
5297	1	416	15	14	19.1
5109	1	416	8	6	11.5
4791	1	416	8	8	15.3
4081	1	315	8	8	13.5
4746	1	315	15	13	14.8
4205	1	315	5	5	9
4272	1	315	13	11	13.1
4049	1	315	3	3	5.2
4257	1	315	9	9	11.4
3668	2	315	11	11	12.8
5465	1	416	11	11	13.2
5335	1	416	5	5	7.4
5472	1	416	17	14	16.2
5471	1	416	11	11	15.9
3419	3	416	17	14	19
5425	1	416	10	10	15.6
3870	2	415	14	12	14.8
4541	1	415	10	10	15.4
3473	2	415	20	18	24
4767	1	415	16	15	22.3
4330	1	315	13	12	17.4
3554	2	315	14	13	19
4487	1	315	15	13	15.5
3965	1	315	13	13	16.2
3930	2	416	12	8	12.6
5241	1	416	16	14	15.7
5184	1	416	14	14	19
4853	1	416	12	8	12
5509	1	416	9	9	13.1
4990	1	416	15	13	19.8
5151	1	416	15	15	20.3
3885	2	416	16	14	18.5
5255	1	416	16	15	22.2
5435	1	416	15	15	18.8
5483	1	416	17	15	19.6
5413	1	416	15	12	17.2
4894	1	416	14	14	18
5154	1	416	16	14	21.4
5385	1	416	13	13	15.5
5031	1	416	17	15	18.4
5201	1	416	11	9	10.2
4161	1	315	12	10	12.3
5120	1	416	15	14	16
3346	3	416	16	15	15.2
5221	1	416	12	12	22.5
4145	2	416	15	15	12.5
4155	2	416	18	17	19.5
4035	2	416	8	8	15.6
3811	2	416	16	16	20.9
4058	2	416	17	16	25.6
4152	2	416	19	16	20.2
5278	1	416	13	13	15.5
5306	1	416	13	13	16.9
4851	1	416	16	13	14.9
5119	1	416	18	15	17.1
3320	3	416	10	10	19
4180	2	416	16	15	20.4
4984	1	416	8	8	13.1
4793	1	416	13	12	19.8
4396	2	416	19	19	23.4
5226	1	416	16	16	21.3
3868	2	416	11	11	19.7
5114	1	416	7	7	13
4293	2	416	17	15	19.6
3948	2	416	13	9	12.6
3452	3	416	14	11	16.7
3982	2	416	17	17	23
4173	2	416	15	15	19.7
3144	3	416	21	16	22.3
5563	1	416	8	8	9.5
3990	2	416	13	13	21.4
5193	1	416	15	15	20.1
3427	3	416	17	13	18
4098	2	416	15	15	22.7
5338	1	416	18	15	18.2
4123	2	416	18	18	24.8
5501	1	416	11	11	13.4
4951	1	416	17	17	19
5078	1	416	16	15	19.3
5161	1	416	17	15	20
4867	1	416	18	17	21.2
5082	1	416	12	12	15.5
5263	1	416	16	15	20.1
5296	1	416	10	10	15.1
3996	2	416	15	15	20.9
5475	1	416	13	11	16.3
5458	1	416	15	15	19.4
5057	1	416	13	13	17.9
4847	1	416	17	13	15.8
5389	1	416	17	17	21
4995	1	416	11	11	19.9
4881	1	416	12	12	13.1
3494	3	416	21	19	23.5
3931	2	416	16	16	19.6
5379	1	416	10	10	15.2
5366	1	416	19	18	21.2
5430	1	416	13	13	18.8
4618	1	416	12	10	14.4
3978	2	416	11	9	10.8
4078	1	416	12	11	20.7
4009	2	416	15	15	14.4
4303	2	416	14	14	16.5
3923	2	416	14	13	16.8
4160	2	416	18	15	16.3
5336	1	416	15	13	15.1
4996	1	416	18	17	20.2
3618	2	416	13	13	23.6
3837	2	416	14	13	21.5
3495	3	416	18	15	23.8
4191	2	416	15	14	15.5
5343	1	416	12	11	12
4111	2	416	24	20	27.7
4159	2	416	16	15	20.9
4357	2	416	18	13	17.1
4012	2	416	17	17	19.5
4277	2	416	15	14	16.8
5014	1	416	14	14	17.4
5125	1	416	13	11	17
4172	2	416	16	15	18.3
4114	2	416	15	15	19.1
4219	2	416	15	13	19.9
3488	3	416	16	14	20.4
4304	2	416	17	16	21
4067	2	416	16	15	24.4
4134	2	416	11	10	13.9
5340	1	416	9	9	16.6
3750	2	416	17	13	18.9
4217	1	416	20	19	20.2
4166	2	416	19	19	28.4
4097	2	416	10	10	15.9
5117	1	416	10	8	10.6
5358	1	416	10	9	11.4
4165	2	416	12	10	16.3
4156	2	416	13	13	20.6
3961	2	416	20	18	19.3
4354	2	416	14	14	18.4
4089	2	416	13	13	22.3
4092	2	416	13	12	19.1
4829	1	416	13	12	13.6
4863	1	416	12	10	17.2
5383	1	416	13	12	14.4
5420	1	416	16	16	19.3
4343	2	416	21	20	23.6
5160	1	416	12	12	16.6
4929	1	416	18	17	20.8
4954	1	416	15	14	14.9
4915	1	416	15	13	14.7
4536	1	416	9	9	11
5422	1	416	13	13	16.1
4048	2	416	13	13	19.6
5511	1	416	14	10	14
3587	2	416	6	6	9
5494	1	416	13	11	10.5
5331	1	416	13	13	16.7
3951	2	416	12	11	16.3
3397	3	416	18	14	18
5102	1	416	14	14	20.5
5371	1	416	17	17	20.5
3988	2	416	20	18	17.7
5357	1	416	16	14	16.7
5438	1	416	16	15	21.7
5654	1	416	12	11	15.4
4222	2	416	16	13	16
4194	2	416	14	11	16
4118	2	416	17	17	16.6
5643	1	416	12	12	17.1
4091	2	416	11	10	14.3
5448	1	416	18	16	20.7
4075	2	416	12	12	13
5370	1	416	15	10	7.3
4043	2	416	17	16	16.2
5431	1	416	11	8	11.2
5478	1	416	15	14	17.6
5257	1	416	12	12	16.3
5433	1	416	8	7	8.5
4171	2	416	14	12	12.9
4247	2	416	14	12	15.9
3451	3	416	17	15	19.5
4070	2	416	15	14	16.2
5498	1	416	16	16	18.7
5356	1	416	12	12	14.8
5634	1	416	15	13	15.9
5665	1	416	12	12	16.5
4276	2	416	18	16	16.8
4218	2	416	19	18	26.3
5502	1	416	11	9	12.2
5280	1	416	15	15	17.6
4916	1	416	13	6	8.1
5510	1	416	13	13	16.9
4021	2	416	17	14	17
3922	2	416	15	12	14.2
4106	2	416	21	18	21.5
5387	1	416	13	13	12.8
4016	2	416	14	14	20.6
4074	2	416	13	12	17.4
4063	2	416	17	17	19.9
4399	2	416	19	18	22.3
4454	2	416	18	17	26.3
5409	1	416	14	12	14.7
4972	1	416	11	9	11.7
4153	2	416	12	10	15.9
4224	2	416	6	5	8.6
4124	2	416	17	16	14.9
5408	1	416	8	8	12.2
3813	2	416	14	12	15.7
5507	1	416	14	14	15.6
4471	2	416	18	17	23.9
4397	2	416	16	14	17.9
5462	1	416	18	17	21.4
3993	2	416	12	9	15.6
5628	1	416	10	10	13.2
5514	1	416	12	11	15.7
4827	1	416	14	14	20.9
5359	1	416	12	11	14.6
5352	1	416	15	14	19
3479	3	416	16	16	21.2
4523	2	416	15	12	18.2
5378	1	416	13	13	19.4
3939	2	416	17	16	20.7
3921	2	416	11	11	14
4370	2	416	12	11	15.3
4811	1	416	12	12	15.7
5533	1	416	15	15	16.4
3889	2	416	18	16	22.7
4170	2	416	19	17	22
5372	1	416	17	17	20.4
4143	2	416	16	15	20
5659	1	416	12	12	16.2
3499	3	416	20	16	23.5
5581	1	416	13	12	13.3
5463	1	416	11	11	14.9
5108	1	416	14	13	12.9
4275	2	416	13	11	16.8
4334	2	416	9	9	13.6
5604	1	416	12	9	10.1
5376	1	416	15	12	15.3
3477	3	416	25	23	25.6
4059	2	416	16	15	22.3
5455	1	416	18	15	20.8
3791	2	416	20	19	22.8
4685	1	416	14	13	15.5
4050	2	416	10	7	9
3953	2	416	15	15	18.7
5592	1	416	19	17	15.4
5477	1	416	11	11	12.1
5505	1	416	15	15	18.6
5411	1	416	14	12	15.7
4253	2	416	10	10	16.5
5419	1	416	12	12	14.2
3814	2	416	12	11	17.4
5395	1	416	17	15	17.8
5555	1	416	10	9	9.8
4290	1	416	17	16	22.4
4428	2	416	18	17	23.9
4952	1	416	11	11	17.6
3963	2	416	20	20	20.4
4474	2	416	12	12	17.2
5615	1	416	14	11	13.4
5607	1	416	14	13	17.2
3166	3	416	17	13	18.1
5542	1	416	14	14	14.5
4185	2	416	18	17	21.1
5535	1	416	14	13	17
5513	1	416	11	11	16.4
5650	1	416	11	11	16.5
5554	1	416	11	11	15.3
3882	2	416	14	13	19.4
4386	2	416	11	0	0
5651	1	416	15	15	18.6
5621	1	416	14	14	17
4554	2	416	16	16	22
3991	2	416	16	16	24.2
5521	1	416	10	8	13.3
4047	2	416	19	16	16.7
4062	2	416	15	15	21
4453	2	416	12	10	16.9
4957	1	416	16	16	18.4
5300	1	416	11	0	0
5346	1	416	16	12	16.8
5491	1	416	11	10	15.3
3984	2	416	9	7	13.5
5492	1	416	12	10	15.1
4122	2	416	17	17	28.7
5482	1	416	9	9	12.5
4545	2	416	9	9	11.4
5406	1	416	12	11	16.4
5598	1	416	7	7	8.1
5486	1	416	16	15	20.2
3994	2	416	11	11	12.6
5363	1	416	16	15	22.9
4470	2	416	11	11	16.4
5612	1	416	10	9	14.2
5644	1	416	6	4	2.2
5674	1	416	12	10	13.7
5590	1	416	11	11	16.9
5616	1	416	15	13	16.2
5648	1	416	12	12	13.5
5504	1	416	9	9	13.2
5626	1	416	11	11	14.9
5301	1	416	14	14	20.6
5638	1	416	16	15	18.2
5663	1	416	9	5	5.7
4269	2	416	14	14	17.6
3924	2	416	18	17	22.8
5381	1	416	12	12	15
5484	1	416	16	16	21.6
5528	1	416	15	11	15
5610	1	416	13	12	16.4
5672	1	416	16	15	18.3
3932	2	416	16	16	22.3
4071	2	416	17	14	18.6
4339	2	416	8	8	11.7
4116	2	416	19	18	23
3997	2	416	7	7	10.7
4158	2	416	16	16	21.6
4090	2	416	15	15	19.9
4904	1	416	15	15	17.9
[truncated: 19,681 more rows]
